# Supplementary material
Source: PubMed Central journal article supplement (PMC10066392)

**A**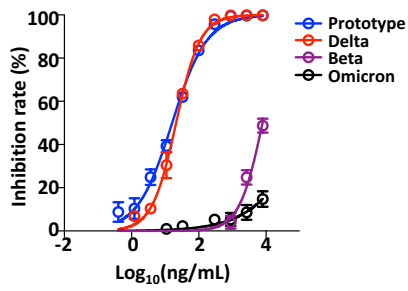**C**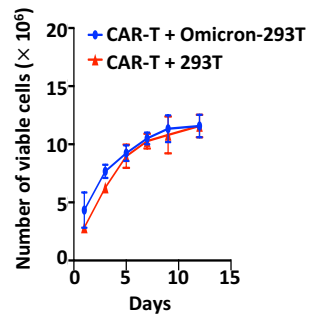**B**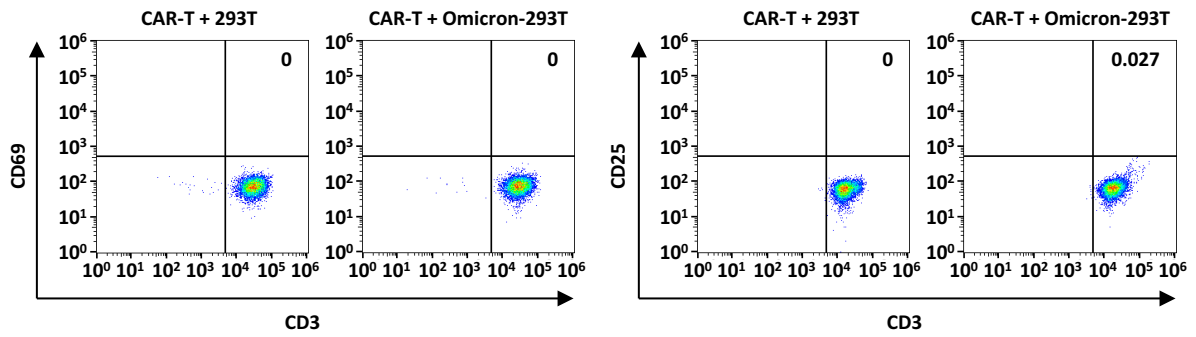

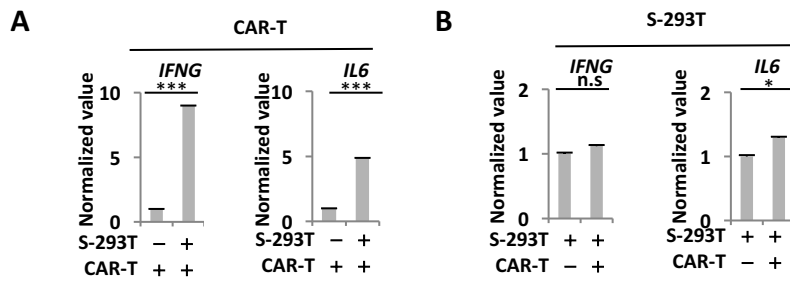

**Figure S2**

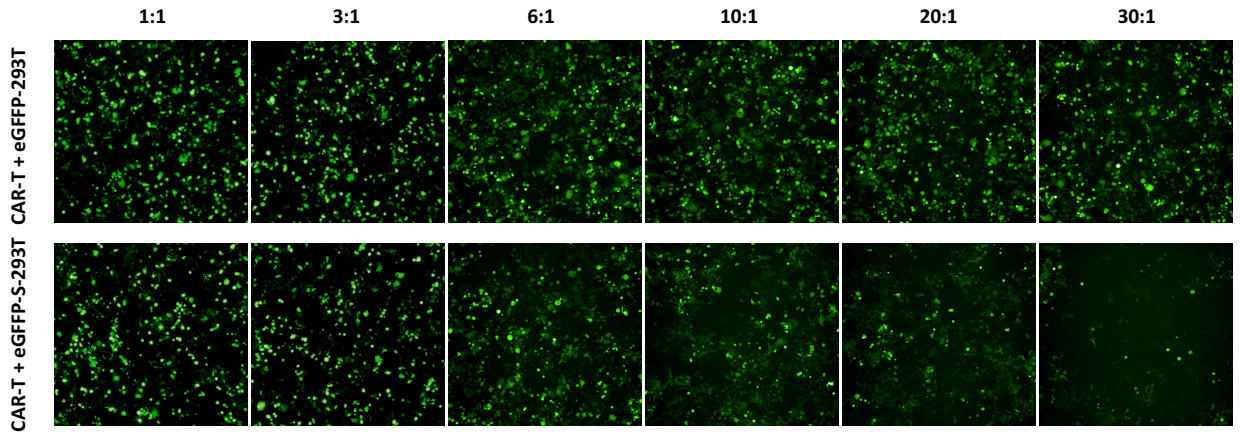

Figure S3

**A**

|                       | CAR-T + 293T   | +           | -           |      |
|-----------------------|----------------|-------------|-------------|------|
|                       | CAR-T + S-293T | -           | +           |      |
| Proliferation         | <i>IL2RA</i>   | 1.00, ±0.00 | 1.51, ±0.02 | **   |
|                       | <i>IL2</i>     | 1.00, ±0.00 | 1.90, ±0.31 | **   |
|                       | <i>AP1</i>     | 1.00, ±0.00 | 3.49, ±0.05 | **** |
| Activation            | <i>NFAT1</i>   | 1.00, ±0.00 | 1.21, ±0.04 | *    |
|                       | <i>RELA</i>    | 1.00, ±0.00 | 2.31, ±0.06 | **   |
|                       | <i>RELB</i>    | 1.00, ±0.00 | 2.27, ±0.17 | **   |
| IFN $\gamma$ response | <i>VCAM1</i>   | 1.00, ±0.00 | 9.23, ±0.50 | **** |
|                       | <i>IFNG</i>    | 1.00, ±0.00 | 1.95, ±0.07 | *    |
|                       | <i>CXCL10</i>  | 1.00, ±0.00 | 4.40, ±0.19 | **** |
|                       | <i>CXCL11</i>  | 1.00, ±0.00 | 5.08, ±0.53 | **** |
|                       | <i>FASLG</i>   | 1.00, ±0.00 | 3.74, ±0.62 | **** |
| Cytotoxicity          |                | Mean, ± SD  |             |      |

**B**

|                           | CAR-T + 293T   | +           | -           |      |  |
|---------------------------|----------------|-------------|-------------|------|--|
|                           | CAR-T + S-293T | -           | +           |      |  |
| Naïve-associated genes    | <i>ACTN1</i>   | 1.00, ±0.00 | 0.78, ±0.07 | *    |  |
|                           | <i>FOXP1</i>   | 1.00, ±0.00 | 0.72, ±0.06 | *    |  |
|                           | <i>TAF4B</i>   | 1.00, ±0.00 | 0.63, ±0.29 | *    |  |
|                           | <i>IL6ST</i>   | 1.00, ±0.00 | 0.60, ±0.05 | **** |  |
|                           | <i>TCF7</i>    | 1.00, ±0.00 | 0.57, ±0.01 | **** |  |
|                           | <i>CD62L</i>   | 1.00, ±0.00 | 0.37, ±0.04 | **** |  |
| Effector-associated genes | <i>PRDM1</i>   | 1.00, ±0.00 | 1.65, ±0.01 | **** |  |
|                           | <i>GZMA</i>    | 1.00, ±0.00 | 2.17, ±0.07 | **** |  |
|                           | <i>TBX21</i>   | 1.00, ±0.00 | 3.82, ±0.24 | **** |  |
|                           | <i>EOMES</i>   | 1.00, ±0.00 | 5.45, ±0.19 | **** |  |
|                           | <i>KLRG1</i>   | 1.00, ±0.00 | 5.32, ±0.04 | **** |  |
|                           | <i>PLEK</i>    | 1.00, ±0.00 | 7.62, ±0.14 | **** |  |
|                           | Cytotoxicity   |             | Mean, ± SD  |      |  |

**C**

|               | CAR-T + 293T   | +           | -           |      |
|---------------|----------------|-------------|-------------|------|
|               | CAR-T + S-293T | -           | +           |      |
| Exhaustion TF | <i>IRF4</i>    | 1.00, ±0.00 | 1.81, ±0.05 | **   |
|               | <i>BATF</i>    | 1.00, ±0.00 | 1.50, ±0.12 | **   |
| Checkpoints   | <i>BTLA</i>    | 1.00, ±0.00 | 1.27, ±0.09 | *    |
|               | <i>LAG3</i>    | 1.00, ±0.00 | 2.47, ±0.07 | **** |
|               | <i>CTLA4</i>   | 1.00, ±0.00 | 1.28, ±0.03 | *    |
|               | <i>TIM3</i>    | 1.00, ±0.00 | 1.44, ±0.07 | **   |
|               | <i>PD1</i>     | 1.00, ±0.00 | 1.18, ±0.15 | *    |
| Cytotoxicity  |                | Mean, ± SD  |             |      |

**A**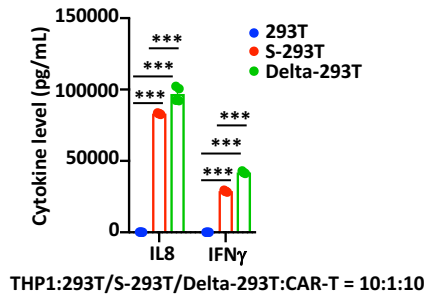**B**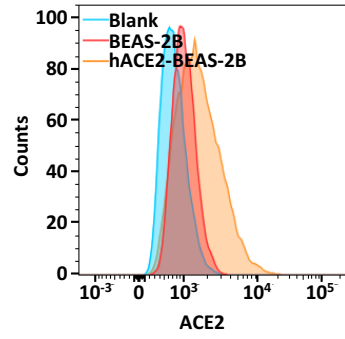**C**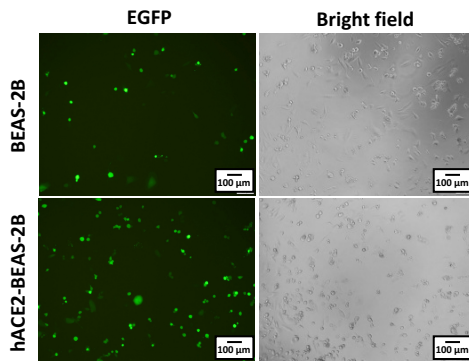**D**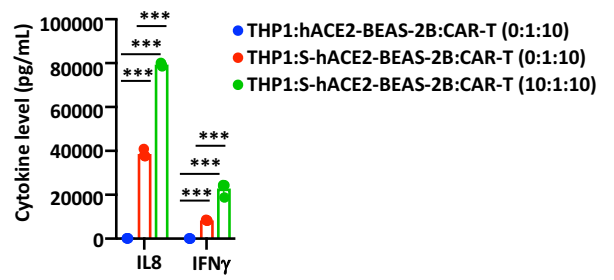

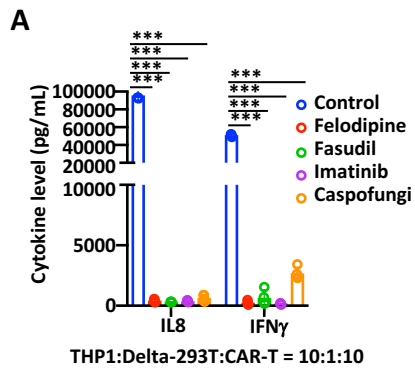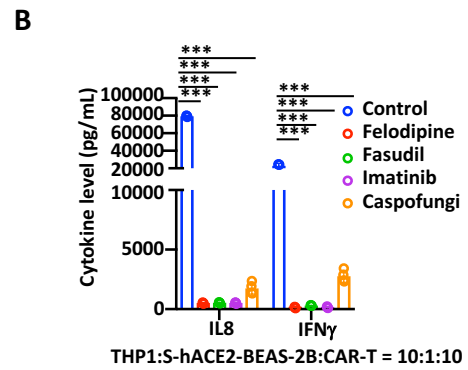

Figure S6

**A**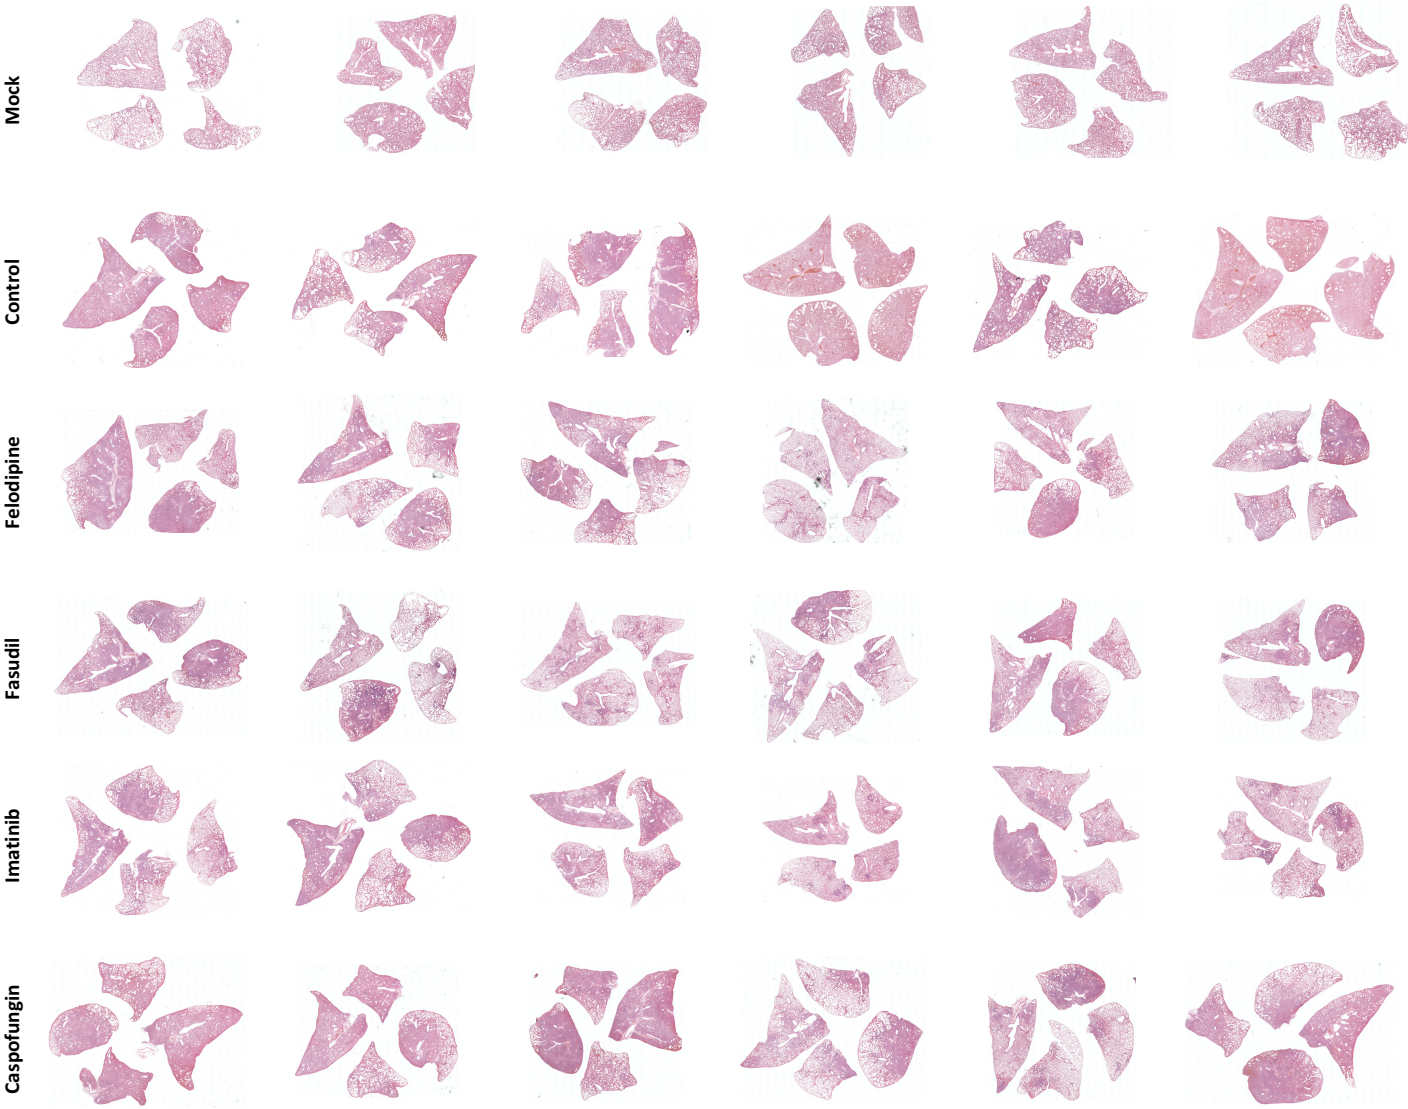**B**

|             |               |               |             |             |              |             |              |             |             |             |             |             |             |             |             |             |             |
|-------------|---------------|---------------|-------------|-------------|--------------|-------------|--------------|-------------|-------------|-------------|-------------|-------------|-------------|-------------|-------------|-------------|-------------|
| 1.00,±0.00  | 1.00,±0.00    | 1.00,±0.00    | 1.00,±0.00  | 1.00,±0.00  | 1.00,±0.00   | 1.00,±0.00  | 1.00,±0.00   | 1.00,±0.00  | 1.00,±0.00  | 1.00,±0.00  | 1.00,±0.00  | 1.00,±0.00  | 1.00,±0.00  | 1.00,±0.00  | 1.00,±0.00  | 1.00,±0.00  | 1.00,±0.00  |
| 21.67,±2.80 | 95.1,±1.11    | 1.92,±1.11    | 37.68,±7.36 | 16.55,±4.11 | 19.50,±10.93 | 69.16,±9.93 | 50.65,±10.66 | 31.87,±9.98 | 31.48,±2.70 | 24.08,±3.99 | 18.81,±5.30 | 7.72,±0.40  | 23.63,±1.72 | 51.12,±2.97 | 24.10,±3.35 | 14.18,±2.87 | 62.46,±6.45 |
| 4.21,±0.71  | 1.95,±0.04    | 0.65,±0.06    | 0.11,±0.02  | 1.32,±0.90  | 0.14,±0.05   | 1.21,±0.15  | 11.87,±9.95  | 1.52,±0.16  | 0.43,±0.01  | 5.08,±0.74  | 1.77,±0.16  | 0.30,±0.01  | 0.47,±0.14  | 9.43,±0.82  | 0.15,±0.04  | 0.17,±0.02  | 15.70,±0.29 |
| 5.09,±2.33  | 0.45,±0.02    | 0.37,±0.00    | 0.27,±0.04  | 1.36,±0.28  | 0.32,±0.20   | 0.54,±0.12  | 12.90,±10.73 | 2.32,±0.27  | 1.16,±0.33  | 7.10,±0.22  | 1.74,±0.18  | 0.67,±0.05  | 0.63,±0.03  | 9.46,±0.87  | 0.40,±0.07  | 0.41,±0.09  | 18.16,±1.57 |
| 0.78,±0.05  | 0.52,±0.03    | 0.28,±0.04    | 0.26,±0.09  | 0.78,±0.02  | 0.46,±0.05   | 0.83,±0.12  | 1.50,±0.22   | 0.74,±0.06  | 0.39,±0.11  | 4.49,±0.51  | 1.22,±0.16  | 0.46,±0.03  | 0.68,±0.03  | 2.01,±0.18  | 0.28,±0.03  | 0.19,±0.01  | 5.53,±1.77  |
| 4.07,±0.22  | 1.93,±0.21    | 0.43,±0.19    | 0.15,±0.04  | 0.97,±0.45  | 0.32,±0.05   | 3.22,±0.70  | 14.36,±3.21  | 1.82,±0.08  | 0.58,±0.14  | 6.51,±0.09  | 1.69,±0.20  | 0.71,±0.06  | 0.47,±0.03  | 7.43,±0.79  | 0.34,±0.05  | 0.22,±0.02  | 17.71,±4.01 |
| <b>CCL3</b> | <b>CXCL15</b> | <b>CXCL12</b> | <b>IL2</b>  | <b>IL4</b>  | <b>IL5</b>   | <b>IL6</b>  | <b>IP10</b>  | <b>IL10</b> | <b>IL13</b> | <b>CCL5</b> | <b>IPNG</b> | <b>CSF2</b> | <b>TNF</b>  | <b>CCL4</b> | <b>LTA</b>  | <b>IL22</b> | <b>IL21</b> |

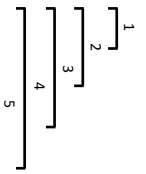

|             |               |               |            |            |            |            |             |             |             |             |             |             |            |             |            |             |             |
|-------------|---------------|---------------|------------|------------|------------|------------|-------------|-------------|-------------|-------------|-------------|-------------|------------|-------------|------------|-------------|-------------|
| 0.0002      | 0.0001        | 0.2303        | 0.0010     | 0.0028     | 0.0427     | 0.0003     | 0.0013      | 0.0059      | 0.0000      | 0.0006      | 0.0043      | 0.0000      | 0.0000     | 0.0000      | 0.0003     | 0.0014      | 0.0001      |
| 0.0016      | 0.0006        | 0.0420        | 0.0007     | 0.5886     | 0.0003     | 0.1396     | 0.0000      | 0.0099      | 0.0000      | 0.0007      | 0.0015      | 0.0000      | 0.0027     | 0.0001      | 0.0012     | 0.0003      | 0.0000      |
| 0.0028      | 0.0014        | 0.0049        | 0.0016     | 0.2011     | 0.0073     | 0.0115     | 0.1275      | 0.0015      | 0.4457      | 0.0000      | 0.0026      | 0.0016      | 0.0000     | 0.0001      | 0.0046     | 0.0026      | 0.0001      |
| 0.1051      | 0.0142        | 0.0032        | 0.0022     | 0.2679     | 0.0021     | 0.1776     | 0.1052      | 0.0253      | 0.0007      | 0.0004      | 0.0981      | 0.0001      | 0.0001     | 0.0010      | 0.0019     | 0.0003      | 0.0129      |
| 0.0000      | 0.0003        | 0.0213        | 0.0009     | 0.9206     | 0.0008     | 0.0057     | 0.0020      | 0.0006      | 0.0077      | 0.0000      | 0.0048      | 0.0037      | 0.0000     | 0.0002      | 0.0028     | 0.0004      | 0.0020      |
| <b>CCL3</b> | <b>CXCL15</b> | <b>CXCL12</b> | <b>IL2</b> | <b>IL4</b> | <b>IL5</b> | <b>IL6</b> | <b>IP10</b> | <b>IL10</b> | <b>IL13</b> | <b>CCL5</b> | <b>IPNG</b> | <b>CSF2</b> | <b>TNF</b> | <b>CCL4</b> | <b>LTA</b> | <b>IL22</b> | <b>IL21</b> |

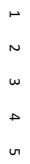**Figure S7**

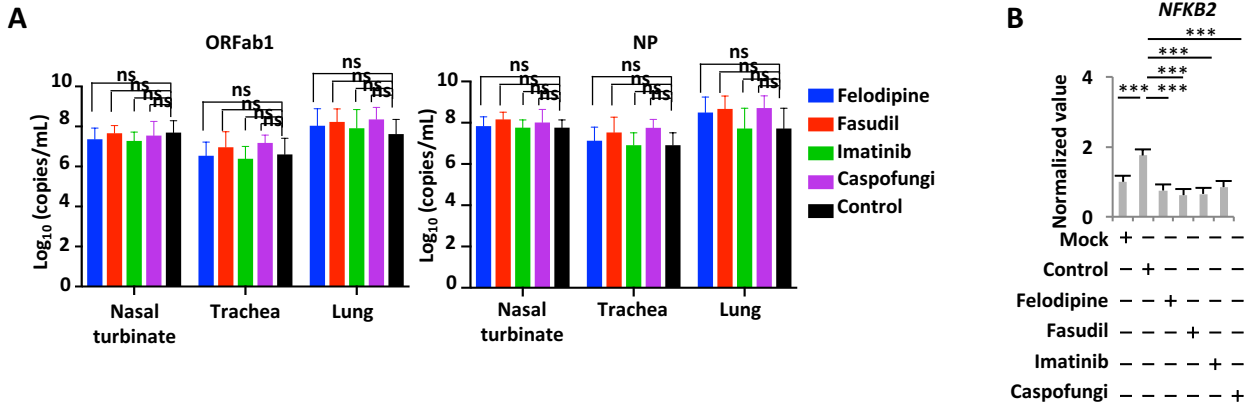

Supplement: 41423_2023_985_MOESM1_ESM.pdf [file 41423_2023_985_MOESM1_ESM.pdf]
