# Supplementary material
Source: PubMed Central journal article supplement (PMC10066392)
Supplement: 41423_2023_985_MOESM2_ESM.pdf [file 41423_2023_985_MOESM2_ESM.pdf]

Table S1. The comprehensive pathological score for the lung lobes in hamsters treated with or without drugs

| Group      | Identifier | Pathological lesions                          |                                                   |                                                    | Comprehensive pathological score for lung lobes | Comprehensive pathological score for hamster |
|------------|------------|-----------------------------------------------|---------------------------------------------------|----------------------------------------------------|-------------------------------------------------|----------------------------------------------|
|            |            | Alveolar septum hyperplasia and consolidation | Pulmonary edema, hemorrhage and mucus suppository | Recruitment and infiltration of inflammatory cells |                                                 |                                              |
| Fasudil    | C779       | 3+3+2+1                                       | 3+3+3+1                                           | 3+3+3+0                                            | 9+9+8+2                                         | 7                                            |
|            | C780       | 3+1+0+0                                       | 3+1+1+1                                           | 3+1+0+0                                            | 9+3+1+1                                         | 3.5                                          |
|            | C781       | 1+0+0+0                                       | 1+1+1+1                                           | 1+1+1+1                                            | 3+2+2+2                                         | 2.25                                         |
|            | C782       | 2+1+1+0                                       | 2+1+1+1                                           | 3+1+1+0                                            | 7+3+3+1                                         | 3.5                                          |
|            | C783       | 4+2+1+1                                       | 3+3+2+1                                           | 4+3+2+1                                            | 11+8+5+3                                        | 6.75                                         |
|            | C784       | 4+1+0+0                                       | 3+2+1+1                                           | 4+2+0+0                                            | 11+5+1+1                                        | 4.5                                          |
| Caspofungi | C785       | 4+3+3+2                                       | 4+4+4+3                                           | 4+4+4+3                                            | 12+11+11+8                                      | 10.5                                         |
|            | C786       | 3+3+2+1                                       | 4+3+3+1                                           | 4+3+3+1                                            | 11+9+8+3                                        | 7.75                                         |
|            | C787       | 4+4+3+1                                       | 4+4+4+1                                           | 4+4+4+2                                            | 12+12+11+4                                      | 9.75                                         |
|            | C788       | 3+1+1+1                                       | 3+2+1+1                                           | 3+1+1+1                                            | 9+4+3+3                                         | 4.5                                          |
|            | C789       | 3+1+0+0                                       | 3+1+1+1                                           | 4+2+1+1                                            | 10+4+2+2                                        | 4.5                                          |
|            | C790       | 4+4+3+2                                       | 4+3+3+2                                           | 4+3+3+2                                            | 12+10+9+6                                       | 9.25                                         |
| Felodipine | C791       | 4+3+1+1                                       | 4+3+1+1                                           | 4+4+0+0                                            | 12+10+2+2                                       | 6.5                                          |
|            | C792       | 3+3+2+0                                       | 3+3+1+1                                           | 3+3+2+1                                            | 9+9+5+2                                         | 6.25                                         |
|            | C793       | 3+3+2+1                                       | 3+2+2+1                                           | 3+2+2+0                                            | 9+7+6+2                                         | 6                                            |
|            | C794       | 0+0+0+0                                       | 1+1+1+1                                           | 0+0+0+0                                            | 1+1+1+1                                         | 1                                            |
|            | C795       | 3+1+1+1                                       | 3+1+1+1                                           | 4+0+0+1                                            | 10+2+2+3                                        | 4.25                                         |
|            | C796       | 4+1+1+1                                       | 4+2+2+1                                           | 4+2+2+1                                            | 12+5+5+3                                        | 6.25                                         |
| Imatinib   | C797       | 3+3+0+0                                       | 2+2+1+1                                           | 3+3+1+0                                            | 8+8+2+1                                         | 4.75                                         |
|            | C798       | 3+3+0+0                                       | 3+3+1+1                                           | 4+3+2+1                                            | 10+9+3+2                                        | 6                                            |
|            | C799       | 3+2+1+1                                       | 3+2+2+1                                           | 3+3+2+1                                            | 9+7+5+3                                         | 6                                            |
|            | C800       | 1+1+1+0                                       | 1+1+1+1                                           | 1+1+1+1                                            | 3+3+3+2                                         | 2.75                                         |
|            | C801       | 4+1+1+1                                       | 4+1+1+1                                           | 4+2+2+0                                            | 12+4+4+2                                        | 5.5                                          |
|            | C802       | 1+0+0+0                                       | 1+1+1+1                                           | 2+1+0+0                                            | 4+3+1+1                                         | 1.75                                         |
| Control    | C803       | 4+4+4+4                                       | 4+4+4+4                                           | 4+4+4+4                                            | 12+12+12+12                                     | 12                                           |
|            | C804       | 3+3+2+2                                       | 3+3+3+1                                           | 3+3+3+2                                            | 9+9+8+5                                         | 7.75                                         |
|            | C805       | 4+4+3+2                                       | 4+4+3+1                                           | 4+4+3+2                                            | 12+12+9+5                                       | 9.5                                          |
|            | C806       | 4+4+4+4                                       | 4+4+4+4                                           | 4+4+4+4                                            | 12+12+12+12                                     | 12                                           |
|            | C807       | 3+3+3+1                                       | 3+3+3+2                                           | 3+3+3+2                                            | 9+9+9+5                                         | 8                                            |
|            | C808       | 4+4+4+3                                       | 4+4+4+3                                           | 4+4+4+3                                            | 12+12+12+9                                      | 11.25                                        |
| Mock       | X1         | 1+1+0+0                                       | 1+1+1+0                                           | 0+0+0+0                                            | 2+2+1+0                                         | 1.25                                         |
|            | X2         | 1+1+1+1                                       | 2+2+2+2                                           | 0+0+0+0                                            | 3+3+3+3                                         | 3                                            |
|            | X3         | 1+1+1+1                                       | 2+1+1+1                                           | 0+0+0+0                                            | 3+2+2+2                                         | 2.25                                         |
|            | X4         | 1+1+1+1                                       | 2+1+1+1                                           | 0+0+0+0                                            | 3+2+2+2                                         | 2.25                                         |
|            | X5         | 1+1+1+1                                       | 2+2+2+2                                           | 0+0+0+0                                            | 3+3+3+3                                         | 3                                            |
|            | X6         | 1+1+1+0                                       | 2+1+1+1                                           | 0+0+0+0                                            | 3+2+2+1                                         | 2                                            |
